# Supplementary material for: Learning the intrinsic dynamics of spatio-temporal processes through Latent Dynamics Networks
Source: PubMed Central journal article supplement (PMC11258335; doi:10.1038/s41467-024-45323-x), 2024-02-28
Supplement: 41467_2024_45323_MOESM3_ESM.pdf [file 41467_2024_45323_MOESM3_ESM.pdf]

## Description of Additional Supplementary Files

### **Supplementary Movies**

**Supplementary Movie 1:** animated versions of Figure 4 of the main text, for sample number 1 of the testing set.

**Supplementary Movie 2:** animated versions of Figure 4 of the main text, for sample number 2 of the testing set.

**Supplementary Movie 3:** animated versions of Figure 4 of the main text, for sample number 3 of the testing set.

**Supplementary Movie 4:** animated versions of Figure 4 of the main text, for sample number 4 of the testing set.

**Supplementary Movie 5:** animated versions of Figure 4 of the main text, for sample number 5 of the testing set.

**Supplementary Movie 6:** animated versions of Figure 4 of the main text, for sample number 6 of the testing set.

**Supplementary Movie 7:** animated versions of Figure 4 of the main text, for sample number 7 of the testing set.

**Supplementary Movie 8:** animated versions of Figure 4 of the main text, for sample number 8 of the testing set.

**Supplementary Movie 9:** animated versions of Figure 4 of the main text, for sample number 9 of the testing set.

**Supplementary Movie 10:** animated versions of Figure 4 of the main text, for sample number 10 of the testing set.

**Supplementary Movie 11:** animated versions of Figure 5 of the main text, for sample number 1 of the testing set.

**Supplementary Movie 12:** animated versions of Figure 5 of the main text, for sample number 2 of the testing set.

**Supplementary Movie 13:** animated versions of Figure 5 of the main text, for sample number 3 of the testing set.

**Supplementary Movie 14:** animated versions of Figure 5 of the main text, for sample number 4 of the testing set.

**Supplementary Movie 15:** animated versions of Figure 5 of the main text, for sample number 5 of the testing set.

**Supplementary Movie 16:** animated versions of Figure 5 of the main text, for sample number 6 of the testing set.

**Supplementary Movie 17:** animated versions of Figure 5 of the main text, for sample number 7 of the testing set.

**Supplementary Movie 18:** animated versions of Figure 5 of the main text, for sample number 8 of the testing set.

**Supplementary Movie 19:** animated versions of Figure 5 of the main text, for sample number 9 of the testing set. - **Supplementary Movie 20:** animated versions of Figure 5 of the main text, for sample number 10 of the testing set.

**Supplementary Movie 20:** animated versions of Figure 5 of the main text, for sample number 10 of the testing set.

**Supplementary Movie 21:** animated versions of Figure 6 of the SI, for sample number 1 of the testing set. - **Supplementary Movie 22:** animated versions of Figure 6 of the SI, for sample number 2 of the testing set.

**Supplementary Movie 23:** animated versions of Figure 6 of the SI, for sample number 3 of the testing set.

**Supplementary Movie 24:** animated versions of Figure 6 of the SI, for sample number 4 of the testing set.

**Supplementary Movie 25:** animated versions of Figure 6 of the SI, for sample number 5 of the testing set.

**Supplementary Movie 26:** animated versions of Figure 6 of the SI, for sample number 6 of the testing set.

**Supplementary Movie 27:** animated versions of Figure 6 of the SI, for sample number 7 of the testing set.

**Supplementary Movie 28:** animated versions of Figure 6 of the SI, for sample number 8 of the testing set.

**Supplementary Movie 29:** animated versions of Figure 6 of the SI, for sample number 9 of the testing set.

**Supplementary Movie 30:** animated versions of Figure 6 of the SI, for sample number 10 of the testing set.

**Supplementary Movie 31:** animated versions of Figure 8 of the main text, for 3 different samples of the testing set.
